# Supplementary material
Source: MDPI journal article supplement (https://www.mdpi.com/2071-1050/9/12/2176)
Supplement: s1 [file s1]

## Sheet: Master, GHS
Country code	Country name	GHS implementation key (0-2)	Legislation	GHS rev	Comment	Link 1	Link 2
AND	Andorra	2	Regulation (EC) No 1272/2008 of the European Parliament and of the Council of 16 December 2008 on classification, labelling and packaging of substances and mixtures, amending and repealing Directives 67/548/EEC and 1999/45/EC, and amending Regulation (EC) No 1907/2006 (Text with EEA relevance), http://eur-lex.europa.eu/legal-content/EN/TXT/?uri=CELEX:32008R1272	Continuously revised as new GHS revisions are published, currently at the 5th rev	Andorra applies the CLP regulation.	http://eur-lex.europa.eu/legal-content/EN/TXT/?uri=CELEX:32008R1272
AFG	Afghanistan	0			No information found.
AGO	Angola	0			SADC member, agreed to implement GHS by 2020, no further information found.
ALB	Albania	2	Integrated Chemicals Management Law	GHS rev. 6	The chemicals management law was passed in 2016 and will enter into force of Marach 29th 2018 and fully implement the GHS	http://www.complianceandrisks.com/regulations/albania-integrated-chemicals-management-draft-law-august-2015-28126/
ARE	United Arab Emirates	0			The Emirate of Abu Dhabi accepts the international model regulations of GHS, but does not mandate them.
ARG	Argentina	1	IRAM 41400-2006: Chemical Products SDS Contents and Order of Sections (updated in 2013), IRAM 41401: Chemical Product Labelling (updated in 2014)	GHS rev. 5 (2013)	First implemented as voluntary standards, since 1st January 2017 compulsory standards for the workplace.	http://servicios.infoleg.gob.ar/infolegInternet/anexos/250000-254999/252805/norma.htm
ARM	Armenia	2	On the safety of chemical products, technical regulation of the Eurasian Economic Union (EAEU) Adopted on March 3rd 2017, expected to come into force on June 2nd 2021	GHS rev. 4 (2011)	Adopted on March 3rd 2017, expected to come into force on June 2nd 2021	http://www.eurasiancommission.org/en/nae/news/Pages/3-03-2017-3.aspx
ATG	Antigua and Barbuda	0			No information found	http://www.mwh.gov.jm/emd/publications/GHS%20Caribbean%20Assessment%20Report%20August%202013.pdf
AUS	Australia	1		GHS rev. 3 (2009)	Implemented in the workplace, but not for Victoria, Western Australia and the Australian Capital Territory.	https://infrastructure.gov.au/transport/australia/dangerous/	http://www.safeworkaustralia.gov.au/sites/swa/about/publications/pages/model-whs-regulations
AUT	Austria	2	Regulation (EC) No 1272/2008 of the European Parliament and of the Council of 16 December 2008 on classification, labelling and packaging of substances and mixtures, amending and repealing Directives 67/548/EEC and 1999/45/EC, and amending Regulation (EC) No 1907/2006 (Text with EEA relevance), http://eur-lex.europa.eu/legal-content/EN/TXT/?uri=CELEX:32008R1272	Continuously revised as new GHS revisions are published, currently at the 5th rev	Mandatory EU legislation	http://eur-lex.europa.eu/legal-content/EN/TXT/?uri=CELEX:32008R1272
AZE	Azerbaijan	0		GHS rev. 4 (2011)	The CIS countries have agreed on a number of voluntary standards (GOST 30333-2007, GOST 31340-2013 and GOST 32419-2013) corresponding to the 4th revision of GHS and the classification system uses all categories and classes. Not all countries have started to implement the standards.	www.gostinfo.ru
BDI	Burundi	0			No information found.
BEL	Belgium	2	Regulation (EC) No 1272/2008 of the European Parliament and of the Council of 16 December 2008 on classification, labelling and packaging of substances and mixtures, amending and repealing Directives 67/548/EEC and 1999/45/EC, and amending Regulation (EC) No 1907/2006 (Text with EEA relevance), http://eur-lex.europa.eu/legal-content/EN/TXT/?uri=CELEX:32008R1272	Continuously revised as new GHS revisions are published, currently at the 5th rev	Mandatory EU legislation	http://eur-lex.europa.eu/legal-content/EN/TXT/?uri=CELEX:32008R1272
BEN	Benin	0			No information found.
BFA	Burkina Faso	0			Workshop held in 2013. No additional information found.	http://www.unitar.org/launch-chemicals-management-project-burkina-faso
BGD	Bangladesh	0			No information found.
BGR	Bulgaria	2	Regulation (EC) No 1272/2008 of the European Parliament and of the Council of 16 December 2008 on classification, labelling and packaging of substances and mixtures, amending and repealing Directives 67/548/EEC and 1999/45/EC, and amending Regulation (EC) No 1907/2006 (Text with EEA relevance), http://eur-lex.europa.eu/legal-content/EN/TXT/?uri=CELEX:32008R1272	Continuously revised as new GHS revisions are published, currently at the 5th rev	Mandatory EU legislation	http://eur-lex.europa.eu/legal-content/EN/TXT/?uri=CELEX:32008R1272
BHR	Bahrain	0			Has a labelling standard.	http://cwm.unitar.org/publications/publications/event/ghs_arab_workshop_2006/Arab_Regional_GHS_Workshop_Report_final_rev.pdf
BHS	Bahamas	0			No information found.		http://www.mwh.gov.jm/emd/publications/GHS%20Caribbean%20Assessment%20Report%20August%202013.pdf
BIH	Bosnia and Herzegovina	2	Law on chemicals in the Republic of Srpska, (Official Gazette of the Republic of Srpska, no 25/09)		GHS has been implemented in Republika Spska, the same implementation is being prepared in the Federation B-H. The Rulebook on classification, packaging and labelling of chemicals and certain products (Official Gazette of the Republic of Srpska, no 9/16, 89/16) is applicable in Republika Srpska with support of the “Law on chemicals in the Republic of Srpska” (Official Gazette of the Republic of Sr…	http://www.unep.ba/republic-of-srpska.html
BLR	Belarus	2	On the safety of chemical products, technical regulation of the Eurasian Economic Union (EAEU) Adopted on March 3rd 2017, expected to come into force on June 2nd 2021	GHS rev. 4 (2011)	Adopted on March 3rd 2017, expected to come into force on June 2nd 2021	http://www.eurasiancommission.org/en/nae/news/Pages/3-03-2017-3.aspx
BLZ	Belize	0			No information found.		http://www.mwh.gov.jm/emd/publications/GHS%20Caribbean%20Assessment%20Report%20August%202013.pdf
BOL	Bolivia	0			SAICM QSP project on GHS is ongoing (UNITAR).	https://www.unece.org/fileadmin/DAM/trans/doc/2015/dgac10c4/UN-SCEGHS-29-INF05e.pdf			http://hotsite.mma.gov.br/consultasubstanciasquimicas/wp-content/uploads/sites/32/2016/06/Anteprojeto-de-Lei.pdf
BRA	Brazil	1	ABNT NBR 14725:2009 (Part 1-4)	GHS rev. 4 (2011)	Fully implemented for the industrial workplace. Work is ongoing to prepare a framework law on chemicals which may implement GHS in additional sectors.	http://www.chemsafetypro.com/Topics/GHS/GHS_in_Brazil.html	https://www.abntcatalogo.com.br/norma.aspx?ID=332668	http://www.ebah.com.br/content/ABAAAe-PUAJ/nbr-14725-3
BRB	Barbados	0			Barbados has a national GHS implementation strategy from 2014 (through a UNITAR project). The implementation of the strategy is ongoing, currently preparations for development of legislation are ongoing.	http://gisbarbados.gov.bb/blog/ghs-to-improve-the-way-chemicals-are-managed-in-barbados/	http://www.mwh.gov.jm/emd/publications/GHS%20Caribbean%20Assessment%20Report%20August%202013.pdf
BRN	Brunei Darussalam	0			No information found.
BTN	Bhutan	0			No information found.
BWA	Botswana	0			Botswana has announced GHS implementation by August 2017, but no legislative text has been released to our knowledge. SADC member.	http://www.dailynews.gov.bw/news-details.php?nid=8384
CAF	Central African Republic	0			No information found.
CAN	Canada	1	Hazardous Products Regulation (HRP)	GHS rev. 5 (2013)	GHS implemented in the workplace.	http://www.ccohs.ca/oshanswers/chemicals/whmis_ghs/general.html	http://laws-lois.justice.gc.ca/eng/regulations/SOR-2001-269/index.html	http://www.hc-sc.gc.ca/ewh-semt/occup-travail/whmis-simdut/ghs-sgh/index-eng.php
CHE	Switzerland	2	Swiss Chemicals Ordinance (ChemO)	Following EU CLP revisions	Implementing the EU CLP	https://www.bafu.admin.ch/dam/bafu/en/dokumente/chemikalien/uw-umwelt-wissen/ghs_in_der_schweizvolkswirtschaftlichebeurteilungdereinfuehrungd.pdf.download.pdf/ghs_in_switzerlandsummary.pdf
CHL	Chile	0	Standard NCh2245:2015		A number of national standards related to the GHS are in place, they are voluntary.	http://www.ghs-chile.cl/normativa-nacional/
CHN	China	2	B/T 3Decree 591 - Regulations on Safe Management of Hazardous Chemicals2374-2015: Phrase and Codification of Chemical Hazard Statements	GHS rev. 4 (2011)	Full implementation	http://www.chemsafetypro.com/Topics/China/GHS_in_China_SDS_label.html	http://www.cirs-reach.com/China_Chemical_Regulation/Regulations_on_safe_management_on_hazardous_chemicals_China_2011.pdf
CIV	Cote d'Ivoire	0			No information found.
CMR	Cameroon	0			No information found.
COD	Democratic Republic of the Congo	0			SADC member, agreed to implement GHS by 2020, no further information found.
COG	Congo	0			No information found.
COL	Colombia	0		GHS rev. 4 (2011)	Classification and use of SDSs and labelling according to GHS is accepted but not required. A draft proposal to adopt the 6th revision of GHS has been presented with 36 months transition period for substances and mixtures.	https://www.minsalud.gov.co/sites/rid/Lists/BibliotecaDigital/RIDE/VS/PP/SA/lineamientos-implementacion-sga.pdf
COM	Comoros	0			No information found.
CPV	Cape Verde	0			No information found.
CRI	Costa Rica	0	Decree 28113 on SDS		Proposed in 2016 to fully implement the 6th revision, this would repeal the decree 28113 on SDS. Transition period of 12 months proposed.	http://www.bvsde.paho.org/bvsacd/cd38/CostaRica/D-28113.pdf
CUB	Cuba	0			No information found.	http://www.un.org/esa/dsd/dsd_aofw_ni/ni_pdfs/NationalReports/costa_rica/web/chemicals.pdf
CYP	Cyprus	2	Regulation (EC) No 1272/2008 of the European Parliament and of the Council of 16 December 2008 on classification, labelling and packaging of substances and mixtures, amending and repealing Directives 67/548/EEC and 1999/45/EC, and amending Regulation (EC) No 1907/2006 (Text with EEA relevance), http://eur-lex.europa.eu/legal-content/EN/TXT/?uri=CELEX:32008R1272	Continuously revised as new GHS revisions are published, currently at the 5th rev	Mandatory EU legislation	http://eur-lex.europa.eu/legal-content/EN/TXT/?uri=CELEX:32008R1272
CZE	Czech Republic	2	Regulation (EC) No 1272/2008 of the European Parliament and of the Council of 16 December 2008 on classification, labelling and packaging of substances and mixtures, amending and repealing Directives 67/548/EEC and 1999/45/EC, and amending Regulation (EC) No 1907/2006 (Text with EEA relevance), http://eur-lex.europa.eu/legal-content/EN/TXT/?uri=CELEX:32008R1272	Continuously revised as new GHS revisions are published, currently at the 5th rev	Mandatory EU legislation	http://eur-lex.europa.eu/legal-content/EN/TXT/?uri=CELEX:32008R1272
DEU	Germany	2	Regulation (EC) No 1272/2008 of the European Parliament and of the Council of 16 December 2008 on classification, labelling and packaging of substances and mixtures, amending and repealing Directives 67/548/EEC and 1999/45/EC, and amending Regulation (EC) No 1907/2006 (Text with EEA relevance), http://eur-lex.europa.eu/legal-content/EN/TXT/?uri=CELEX:32008R1272	Continuously revised as new GHS revisions are published, currently at the 5th rev	Mandatory EU legislation	http://eur-lex.europa.eu/legal-content/EN/TXT/?uri=CELEX:32008R1272
DJI	Djibouti	0			No information found.
DMA	Dominica	0			No information found.		http://www.mwh.gov.jm/emd/publications/GHS%20Caribbean%20Assessment%20Report%20August%202013.pdf
DNK	Denmark	2	Regulation (EC) No 1272/2008 of the European Parliament and of the Council of 16 December 2008 on classification, labelling and packaging of substances and mixtures, amending and repealing Directives 67/548/EEC and 1999/45/EC, and amending Regulation (EC) No 1907/2006 (Text with EEA relevance), http://eur-lex.europa.eu/legal-content/EN/TXT/?uri=CELEX:32008R1272	Continuously revised as new GHS revisions are published, currently at the 5th rev	Mandatory EU legislation	http://eur-lex.europa.eu/legal-content/EN/TXT/?uri=CELEX:32008R1272
DOM	Dominican Republic	0			No information found.
DZA	Algeria	0			Algeria has legislation on imports, classification and labelling of chemicals. No information found on alignment with GHS.	http://cwm.unitar.org/publications/publications/event/ghs_arab_workshop_2006/Arab_Regional_GHS_Workshop_Report_final_rev.pdf
ECU	Ecuador	2	Official Gazette NO 881, 2013, and the mandatory standard INEN 2266:2013	GHS rev 1.	Full implementation for substances and mixtures for transport storage and handling of hazardous materials, based on the purple and organe books, in force since 1 January 2017.	http://normaspdf.inen.gob.ec/pdf/nte/2266-2.pdf
EGY	Egypt	0			A national hazardous substances information and management system has been put in place.	http://www.eeaa.gov.eg/ehsims/main/hs_aboutsystem.asp
ERI	Eritrea	0			No information found.
ESP	Spain	2	Regulation (EC) No 1272/2008 of the European Parliament and of the Council of 16 December 2008 on classification, labelling and packaging of substances and mixtures, amending and repealing Directives 67/548/EEC and 1999/45/EC, and amending Regulation (EC) No 1907/2006 (Text with EEA relevance), http://eur-lex.europa.eu/legal-content/EN/TXT/?uri=CELEX:32008R1272	Continuously revised as new GHS revisions are published, currently at the 5th rev	Mandatory EU legislation	http://eur-lex.europa.eu/legal-content/EN/TXT/?uri=CELEX:32008R1272
EST	Estonia	2	Regulation (EC) No 1272/2008 of the European Parliament and of the Council of 16 December 2008 on classification, labelling and packaging of substances and mixtures, amending and repealing Directives 67/548/EEC and 1999/45/EC, and amending Regulation (EC) No 1907/2006 (Text with EEA relevance), http://eur-lex.europa.eu/legal-content/EN/TXT/?uri=CELEX:32008R1272	Continuously revised as new GHS revisions are published, currently at the 5th rev	Mandatory EU legislation	http://eur-lex.europa.eu/legal-content/EN/TXT/?uri=CELEX:32008R1272
ETH	Ethiopia	0			No information found.
FIN	Finland	2	Regulation (EC) No 1272/2008 of the European Parliament and of the Council of 16 December 2008 on classification, labelling and packaging of substances and mixtures, amending and repealing Directives 67/548/EEC and 1999/45/EC, and amending Regulation (EC) No 1907/2006 (Text with EEA relevance), http://eur-lex.europa.eu/legal-content/EN/TXT/?uri=CELEX:32008R1272	Continuously revised as new GHS revisions are published, currently at the 5th rev	Mandatory EU legislation	http://eur-lex.europa.eu/legal-content/EN/TXT/?uri=CELEX:32008R1272
FJI	Fiji	0			No information found.
FRA	France	2	Regulation (EC) No 1272/2008 of the European Parliament and of the Council of 16 December 2008 on classification, labelling and packaging of substances and mixtures, amending and repealing Directives 67/548/EEC and 1999/45/EC, and amending Regulation (EC) No 1907/2006 (Text with EEA relevance), http://eur-lex.europa.eu/legal-content/EN/TXT/?uri=CELEX:32008R1272	Continuously revised as new GHS revisions are published, currently at the 5th rev	Mandatory EU legislation	http://eur-lex.europa.eu/legal-content/EN/TXT/?uri=CELEX:32008R1272
FSM	Micronesia, Federated States of	0			No information found.
GAB	Gabon	0			No information found.
GBR	United Kingdom	2	Regulation (EC) No 1272/2008 of the European Parliament and of the Council of 16 December 2008 on classification, labelling and packaging of substances and mixtures, amending and repealing Directives 67/548/EEC and 1999/45/EC, and amending Regulation (EC) No 1907/2006 (Text with EEA relevance), http://eur-lex.europa.eu/legal-content/EN/TXT/?uri=CELEX:32008R1272	Continuously revised as new GHS revisions are published, currently at the 5th rev	Mandatory EU legislation	http://eur-lex.europa.eu/legal-content/EN/TXT/?uri=CELEX:32008R1272
GEO	Georgia	1			In an EU association agreement which commits Georgia to fully implementing the GHS throough the EU CLP since 2014. No information on the exact status of thir legislative process was found.		https://chemicalwatch.com/18833/eu-association-agreement-drives-chemical-safety-in-georgia
GHA	Ghana	0			No information found.
GIN	Guinea	0			No information found.
GMB	Gambia	0			During 2005-2007, Gambia participated as a pilot country in the UNITAR/ILO Global GHS Capacity Building Programme
GNB	Guinea-Bissau	0			No information found.
GNQ	Equatorial Guinea	0			No information found.
GRC	Greece	2	Regulation (EC) No 1272/2008 of the European Parliament and of the Council of 16 December 2008 on classification, labelling and packaging of substances and mixtures, amending and repealing Directives 67/548/EEC and 1999/45/EC, and amending Regulation (EC) No 1907/2006 (Text with EEA relevance), http://eur-lex.europa.eu/legal-content/EN/TXT/?uri=CELEX:32008R1272	Continuously revised as new GHS revisions are published, currently at the 5th rev	Mandatory EU legislation	http://eur-lex.europa.eu/legal-content/EN/TXT/?uri=CELEX:32008R1272
GRD	Grenada	0			No information found.		http://www.mwh.gov.jm/emd/publications/GHS%20Caribbean%20Assessment%20Report%20August%202013.pdf
GTM	Guatemala	0			No information found.
GUY	Guyana	0			No information found.		http://www.mwh.gov.jm/emd/publications/GHS%20Caribbean%20Assessment%20Report%20August%202013.pdf
HND	Honduras	0			No information found.
HRV	Croatia	2	Regulation (EC) No 1272/2008 of the European Parliament and of the Council of 16 December 2008 on classification, labelling and packaging of substances and mixtures, amending and repealing Directives 67/548/EEC and 1999/45/EC, and amending Regulation (EC) No 1907/2006 (Text with EEA relevance), http://eur-lex.europa.eu/legal-content/EN/TXT/?uri=CELEX:32008R1272	Continuously revised as new GHS revisions are published, currently at the 5th rev	Mandatory EU legislation	http://eur-lex.europa.eu/legal-content/EN/TXT/?uri=CELEX:32008R1272
HTI	Haiti	0			No information found.		http://www.mwh.gov.jm/emd/publications/GHS%20Caribbean%20Assessment%20Report%20August%202013.pdf
HUN	Hungary	2	Regulation (EC) No 1272/2008 of the European Parliament and of the Council of 16 December 2008 on classification, labelling and packaging of substances and mixtures, amending and repealing Directives 67/548/EEC and 1999/45/EC, and amending Regulation (EC) No 1907/2006 (Text with EEA relevance), http://eur-lex.europa.eu/legal-content/EN/TXT/?uri=CELEX:32008R1272	Continuously revised as new GHS revisions are published, currently at the 5th rev	Mandatory EU legislation	http://eur-lex.europa.eu/legal-content/EN/TXT/?uri=CELEX:32008R1272
IDN	Indonesia	2	Decree of Minister of Industry No. 87/M-IND/PER/9/2009 concerning Globally Harmonized System of Classification and Labelling of Chemicals, Decree of Minister of Industry No. 23/M-IND/PER/4/2013 concerning the Revision of 87/M-IND/PER/9/2009, Decree of Director General of Agrochemical No. 21/IAK/PER/4/2010 regarding Technical Training of GHS Implementation for Classification and Labelling on Chemi…	GHS rev. 4 (2011)	Full implementation since 31 December 2016.	http://www.miit.gov.cn/n973401/n974339/n974347/n974349/c3786019/part/3786025.pdf	http://www.chemsafetypro.com/Topics/GHS/GHS_in_Indonesia.html
IND	India	0			India has announced intention to implement GHS, no further information was found.	https://chemicalwatch.com/51013/ghs-the-status-quo
IRL	Ireland	2	Regulation (EC) No 1272/2008 of the European Parliament and of the Council of 16 December 2008 on classification, labelling and packaging of substances and mixtures, amending and repealing Directives 67/548/EEC and 1999/45/EC, and amending Regulation (EC) No 1907/2006 (Text with EEA relevance), http://eur-lex.europa.eu/legal-content/EN/TXT/?uri=CELEX:32008R1272	Continuously revised as new GHS revisions are published, currently at the 5th rev	Mandatory EU legislation	http://eur-lex.europa.eu/legal-content/EN/TXT/?uri=CELEX:32008R1272
IRN	Iran (Islamic Republic of)	0			No information found.
IRQ	Iraq	0			No information found.
ISL	Iceland	2	Regulation (EC) No 1272/2008 of the European Parliament and of the Council of 16 December 2008 on classification, labelling and packaging of substances and mixtures, amending and repealing Directives 67/548/EEC and 1999/45/EC, and amending Regulation (EC) No 1907/2006 (Text with EEA relevance), http://eur-lex.europa.eu/legal-content/EN/TXT/?uri=CELEX:32008R1272	Continuously revised as new GHS revisions are published, currently at the 5th rev	Mandatory EU legislation, Iceland is offical candidate for accession and applies the CLP regulation
ISR	Israel	0	SI 2302 part 1		Israel is planning mandatory GHS implementation but deadline not yet presented. GHS-format SDS and labels prepared in Hebrew are accepted.	http://www.chemsafetypro.com/Topics/GHS/GHS_in_Other_Countries.html
ITA	Italy	2	Regulation (EC) No 1272/2008 of the European Parliament and of the Council of 16 December 2008 on classification, labelling and packaging of substances and mixtures, amending and repealing Directives 67/548/EEC and 1999/45/EC, and amending Regulation (EC) No 1907/2006 (Text with EEA relevance), http://eur-lex.europa.eu/legal-content/EN/TXT/?uri=CELEX:32008R1272	Continuously revised as new GHS revisions are published, currently at the 5th rev	Mandatory EU legislation
JAM	Jamaica	0			Participated in QSP funded project on GHS for the Caribbean region (UNITAR) in 2012-2013. No further information found.		http://www.mwh.gov.jm/emd/publications/GHS%20Caribbean%20Assessment%20Report%20August%202013.pdf
JOR	Jordan	0			An information system for chemicals has been put in place. Additional legislation on chemicals is planned. No information found on possible alignment with the GHS.	http://www.hsms.jo/
JPN	Japan	1	Industrial Safety and Health Law (ISHL), PRTR law, Poisonous and Deleterious Substances Control Law (PSSCL), and the voluntary standards: JIS7253 Hazard Communication of Chemicals Based on GHS - Labelling and Safety Data Sheet	GHS rev. 4 (2011)	Legislation for certain chemicals in the workplace, for others, the classification is voluntary according to a national standard.	http://www.chemsafetypro.com/Topics/Japan/GHS_in_Japan_SDS_label.html
KAZ	Kazakhstan	2	On the safety of chemical products, technical regulation of the Eurasian Economic Union (EAEU)	GHS rev. 4 (2011)	Adopted on March 3rd 2017, expected to come into force on June 2nd 2021	http://www.eurasiancommission.org/en/nae/news/Pages/3-03-2017-3.aspx
KEN	Kenya	0			Participated in regional workshop in October 2016, where a road map for a regional GHS implementation was drafted to be reviewed under 2017.	https://www.daily-mail.co.zm/need-to-harmonise-chemical-labelling/
KGZ	Kyrgyzstan	2	On the safety of chemical products, technical regulation of the Eurasian Economic Union (EAEU)	GHS rev. 4 (2011)	Adopted on March 3rd 2017, expected to come into force on June 2nd 2021	http://www.eurasiancommission.org/en/nae/news/Pages/3-03-2017-3.aspx
KHM	Cambodia	0			From 2006 to 2008, Cambodia participated as a pilot country in the UNITAR/ILO Global GHS Capacity Building Programme.	http://www.lisam.com/en-us/compliance/ghs-global-status/
KIR	Kiribati	0			No information found.
KNA	Saint Kitts and Nevis	0			No information found.		http://www.mwh.gov.jm/emd/publications/GHS%20Caribbean%20Assessment%20Report%20August%202013.pdf
KOR	Korea, Republic of	2	K-REACH, Chemical control act (article 16), Occupational Health and Safety Act (Article 41), Hazardous Materials Act	GHS rev. 4 (2011)	Fully implemented since 2013	http://elaw.klri.re.kr/kor_service/lawView.do?hseq=31605&lang=ENG	http://www.chemsafetypro.com/Topics/Korea/GHS_in_Korea_SDS_label.html
KWT	Kuwait	0			Since 1987, a national monitoring system for chemicals is in place.	http://cwm.unitar.org/publications/publications/event/ghs_arab_workshop_2006/Arab_Regional_GHS_Workshop_Report_final_rev.pdf
LAO	Lao People's Democratic Republic	0			There is a draft chemicals law implementing the GHS, but not further information found.	http://www.laotradeportal.gov.la/index.php?r=site/display&id=888
LBN	Lebanon	0			Legal procedures exist for the control of agricultural pesticides, inudstrial chemicals, domestic pesticides and PCBs. Pesticides are labelled according to FAO and WHO critieria. No information on alignement with the GHS found.	http://cwm.unitar.org/publications/publications/event/ghs_arab_workshop_2006/Arab_Regional_GHS_Workshop_Report_final_rev.pdf
LBR	Liberia	0			No information found.
LBY	Libyan Arab Jamahiriya	0			The environment general authority (EGA) is mandated to authorize import of chemicals. No further information found on GHS related regulations.	http://cwm.unitar.org/publications/publications/event/ghs_arab_workshop_2006/Arab_Regional_GHS_Workshop_Report_final_rev.pdf
LCA	Saint Lucia	0			No information found.		http://www.mwh.gov.jm/emd/publications/GHS%20Caribbean%20Assessment%20Report%20August%202013.pdf
LIE	Liechtenstein	2	Regulation (EC) No 1272/2008 of the European Parliament and of the Council of 16 December 2008 on classification, labelling and packaging of substances and mixtures, amending and repealing Directives 67/548/EEC and 1999/45/EC, and amending Regulation (EC) No 1907/2006 (Text with EEA relevance), http://eur-lex.europa.eu/legal-content/EN/TXT/?uri=CELEX:32008R1272	Continuously revised as new GHS revisions are published, currently at the 5th rev	Mandatory EU legislation, Liechtenstein applies the CLP regulation	http://eur-lex.europa.eu/legal-content/EN/TXT/?uri=CELEX:32008R1272
LKA	Sri Lanka	0			No information found.
LSO	Lesotho	0			SADC member, agreed to implement GHS by 2020, no further information found.
LTU	Lithuania	2	Regulation (EC) No 1272/2008 of the European Parliament and of the Council of 16 December 2008 on classification, labelling and packaging of substances and mixtures, amending and repealing Directives 67/548/EEC and 1999/45/EC, and amending Regulation (EC) No 1907/2006 (Text with EEA relevance), http://eur-lex.europa.eu/legal-content/EN/TXT/?uri=CELEX:32008R1272	Continuously revised as new GHS revisions are published, currently at the 5th rev	Mandatory EU legislation	http://eur-lex.europa.eu/legal-content/EN/TXT/?uri=CELEX:32008R1272
LUX	Luxembourg	2	Regulation (EC) No 1272/2008 of the European Parliament and of the Council of 16 December 2008 on classification, labelling and packaging of substances and mixtures, amending and repealing Directives 67/548/EEC and 1999/45/EC, and amending Regulation (EC) No 1907/2006 (Text with EEA relevance), http://eur-lex.europa.eu/legal-content/EN/TXT/?uri=CELEX:32008R1272	Continuously revised as new GHS revisions are published, currently at the 5th rev	Mandatory EU legislation	http://eur-lex.europa.eu/legal-content/EN/TXT/?uri=CELEX:32008R1272
LVA	Latvia	2	Regulation (EC) No 1272/2008 of the European Parliament and of the Council of 16 December 2008 on classification, labelling and packaging of substances and mixtures, amending and repealing Directives 67/548/EEC and 1999/45/EC, and amending Regulation (EC) No 1907/2006 (Text with EEA relevance), http://eur-lex.europa.eu/legal-content/EN/TXT/?uri=CELEX:32008R1272	Continuously revised as new GHS revisions are published, currently at the 5th rev	Mandatory EU legislation	http://eur-lex.europa.eu/legal-content/EN/TXT/?uri=CELEX:32008R1272
MAR	Morocco	0			Standards in place for classification, packaging and labelling. No further information found on legislation related to GHS.	http://cwm.unitar.org/publications/publications/event/ghs_arab_workshop_2006/Arab_Regional_GHS_Workshop_Report_final_rev.pdf
MCO	Monaco	2	Regulation (EC) No 1272/2008 of the European Parliament and of the Council of 16 December 2008 on classification, labelling and packaging of substances and mixtures, amending and repealing Directives 67/548/EEC and 1999/45/EC, and amending Regulation (EC) No 1907/2006 (Text with EEA relevance), http://eur-lex.europa.eu/legal-content/EN/TXT/?uri=CELEX:32008R1272	Continuously revised as new GHS revisions are published, currently at the 5th rev	Mandatory EU legislation, Monaco applies the CLP regulation	http://eur-lex.europa.eu/legal-content/EN/TXT/?uri=CELEX:32008R1272
MDA	Republic of Moldova	0		GHS rev. 4 (2011)	The CIS countries have agreed on a number of voluntary standards (GOST 30333-2007, GOST 31340-2013 and GOST 32419-2013) corresponding to the 4th revision of GHS and the classification system uses all categories and classes. Not all countries have started to implement the standards.	www.gostinfo.ru
MDG	Madagascar	0			SADC member, agreed to implement GHS by 2020, no further information found.
MDV	Maldives	0			No information found.
MEX	Mexico	1	NOM-018-STPS-2015, Harmonized System for the Identification and Communication of Hazards and Risks of Hazardous Chemicals in the Workplace (Sistema armonizado para la identificación y comunicación de peligros y riesgos por sustancias químicas peligrosas en los centros de trabajo), with deadline in 2018, by when the current standards NOM-018-STPS-2000 and NOM-018-STPS-2014 will be repealed.	GHS rev. 5 (2013)	Implemented in the workplace. Upcoming deadlines for substances and mixtures in 2018.	http://dof.gob.mx/nota_detalle.php?codigo=5411121&fecha=09/10/2015	http://3ecompany.com/resource-center/blog/what-does-latest-implementation-ghs-mexico-entail
MHL	Marshall Islands	0			No information found.
MKD	The former Yugoslav Republic of Macedonia	0	Law on the environment (2005)		EU candidate country, the Law on Environment covers aspects of chemicals management, but the progress on EU CLP alignement could not be confirmed.		http://extwprlegs1.fao.org/docs/pdf/mac105107.pdf
MLI	Mali	0			No information found.
MLT	Malta	2	Regulation (EC) No 1272/2008 of the European Parliament and of the Council of 16 December 2008 on classification, labelling and packaging of substances and mixtures, amending and repealing Directives 67/548/EEC and 1999/45/EC, and amending Regulation (EC) No 1907/2006 (Text with EEA relevance), http://eur-lex.europa.eu/legal-content/EN/TXT/?uri=CELEX:32008R1272	Continuously revised as new GHS revisions are published, currently at the 5th rev	Mandatory EU legislation	http://eur-lex.europa.eu/legal-content/EN/TXT/?uri=CELEX:32008R1272
MMR	Myanmar	0			No information found.
MNE	Montenegro	1	Law on chemicals ("OG of MNE" 18/12), Rulebook on Criteria and the Method for Classification, Packagin and Labelling of Chemicals ("OG of MNE" 53/12), List of classified substances ("OG of MNE" 58/12) as well as the Rulebook on Classification, Packaging and Labelling ("OG of MNE" 11/14, 44/15).		EU candidate country, implementation ongoing and the EU CLP partially implemented by the Law on chemicals and other legislation listed here.		http://www.fao.org/faolex/results/details/en/c/LEX-FAOC139148/	http://www.fao.org/faolex/results/details/en/c/LEX-FAOC139149/
MNG	Mongolia	0			No information found.
MOZ	Mozambique	0			SADC member, agreed to implement GHS by 2020, no further information found.
MRT	Mauritania	0			No information found.
MUS	Mauritius	2	Dangerous Chemicals Control Act 2004	GHS rev. 1 (2003)	Chemicals control act covers workplace, consumers and the environment.	https://www.ecolex.org/details/legislation/dangerous-chemicals-control-act-2004-no-16-of-2004-lex-faoc062529/
MWI	Malawi	0			SADC member, agreed to implement GHS by 2020, no further information found.
MYS	Malaysia	1	Occupational Safety and health (Classification, labelling and safety data sheet of hazardous chemicals) Regulation 2013	GHS rev. 3 (2009)	Implemented for workplace.	http://www.federalgazette.agc.gov.my/outputp/pua_20131011_P%20U%20%20(A)%20310-peraturan-peraturan%20keselamatan%20dan%20kesihatan%20pekerjaan%20(pengelasan%20pelabelan%20dan%20helaian%20data%20keselamatan%20bahan%20kimia%20berbahaya)%202013.pdf
NAM	Namibia	0			SADC member, agreed to implement GHS by 2020, no further information found.
NER	Niger	0			No information found.
NGA	Nigeria	0			During 2005-2007, Nigeria participated as a pilot country in the UNITAR/ILO Global GHS Capacity Building Programme. SADC member, agreed to implement GHS by 2020. No further information found.
NIC	Nicaragua	0			No information found.
NLD	Netherlands	2	Regulation (EC) No 1272/2008 of the European Parliament and of the Council of 16 December 2008 on classification, labelling and packaging of substances and mixtures, amending and repealing Directives 67/548/EEC and 1999/45/EC, and amending Regulation (EC) No 1907/2006 (Text with EEA relevance), http://eur-lex.europa.eu/legal-content/EN/TXT/?uri=CELEX:32008R1272	Continuously revised as new GHS revisions are published, currently at the 5th rev	Mandatory EU legislation	http://eur-lex.europa.eu/legal-content/EN/TXT/?uri=CELEX:32008R1272
NOR	Norway	2	Regulation (EC) No 1272/2008 of the European Parliament and of the Council of 16 December 2008 on classification, labelling and packaging of substances and mixtures, amending and repealing Directives 67/548/EEC and 1999/45/EC, and amending Regulation (EC) No 1907/2006 (Text with EEA relevance), http://eur-lex.europa.eu/legal-content/EN/TXT/?uri=CELEX:32008R1272	Continuously revised as new GHS revisions are published, currently at the 5th rev	Follows EU CLP regulation	http://eur-lex.europa.eu/legal-content/EN/TXT/?uri=CELEX:32008R1272
NPL	Nepal	0			No information found.
NRU	Nauro	0			No information found.
NZL	New Zealand	1	Hazardous Substances and New Organisms Act 1996		Implemented in the workplace.	http://www.legislation.govt.nz/act/public/1996/0030/latest/DLM381222.html	http://www.epa.govt.nz/Publications/EPA_Notices_Discussion_Class_Labelling_SDS_Packaging.pdf
OMN	Oman	0	Royal Decree No. 46/95		Chemicals legislation in place but no information found on alignment with GHS.	http://www.halophiles.info/RD-046-95e-METS.pdf	http://cwm.unitar.org/publications/publications/event/ghs_arab_workshop_2006/Arab_Regional_GHS_Workshop_Report_final_rev.pdf
PAK	Pakistan	0			Has been proposed to implement 6th revision for labeling of imported chemicals.
PAN	Panama	0			No information found.
PER	Peru	0			GHS compliant SDSs accepted
PHL	Philippines	1	Guidelines for the implementation of GHS in chemical saftey program in the workplace (DOLE AO 136-14 and DAO 2015-09) and the DENR Order which covers substances and mixtures that are imported and manufactured.	GHS rev. 4 (2011)	Fully implemented in the workplace. Implemented for chemicals under the Chemicals Control Order (CCO) with upcoming deadlines in 2017 (High Volume Toxic Chemicals), 2018 (Dangerous Goods) and 2019 (mixtures).	http://www.dole.gov.ph/files/DO%20136-14.pdf	http://119.92.161.2/embgovph/Portals/40/DAO-2015-09-GUIDANCE-MANUAL.pdf	http://server2.denr.gov.ph/uploads/rmdd/dao-2015-09.pdf
PLW	Palau	0			No information found.
PNG	Papua New Guinea	0			No information found.
POL	Poland	2	Regulation (EC) No 1272/2008 of the European Parliament and of the Council of 16 December 2008 on classification, labelling and packaging of substances and mixtures, amending and repealing Directives 67/548/EEC and 1999/45/EC, and amending Regulation (EC) No 1907/2006 (Text with EEA relevance), http://eur-lex.europa.eu/legal-content/EN/TXT/?uri=CELEX:32008R1272	Continuously revised as new GHS revisions are published, currently at the 5th rev	Mandatory EU legislation	http://eur-lex.europa.eu/legal-content/EN/TXT/?uri=CELEX:32008R1272
PRK	Korea, Democratic People's Republic of	0			No information found.
PRT	Portugal	2	Regulation (EC) No 1272/2008 of the European Parliament and of the Council of 16 December 2008 on classification, labelling and packaging of substances and mixtures, amending and repealing Directives 67/548/EEC and 1999/45/EC, and amending Regulation (EC) No 1907/2006 (Text with EEA relevance), http://eur-lex.europa.eu/legal-content/EN/TXT/?uri=CELEX:32008R1272	Continuously revised as new GHS revisions are published, currently at the 5th rev	Mandatory EU legislation	http://eur-lex.europa.eu/legal-content/EN/TXT/?uri=CELEX:32008R1272
PRY	Paraguay	0			No information found.
QAT	Qatar	0			No information found.	http://cwm.unitar.org/publications/publications/event/ghs_arab_workshop_2006/Arab_Regional_GHS_Workshop_Report_final_rev.pdf
ROU	Romania	2	Regulation (EC) No 1272/2008 of the European Parliament and of the Council of 16 December 2008 on classification, labelling and packaging of substances and mixtures, amending and repealing Directives 67/548/EEC and 1999/45/EC, and amending Regulation (EC) No 1907/2006 (Text with EEA relevance), http://eur-lex.europa.eu/legal-content/EN/TXT/?uri=CELEX:32008R1272	Continuously revised as new GHS revisions are published, currently at the 5th rev	Mandatory EU legislation	http://eur-lex.europa.eu/legal-content/EN/TXT/?uri=CELEX:32008R1272
RUS	Russia	2	On the safety of chemical products, technical regulation of the Eurasian Economic Union (EAEU) Adopted on March 3rd 2017, expected to come into force on June 2nd 2021	GHS rev. 4 (2011)	Adopted on March 3rd 2017, expected to come into force on June 2nd 2021	http://www.eurasiancommission.org/en/nae/news/Pages/3-03-2017-3.aspx
RWA	Rwanda	0			No information found.
SAU	Saudi Arabia	0			Imports of chemicals are regulated and there is a national programme on chemical safety involving a number of relevant Ministries.	http://cwm.unitar.org/publications/publications/event/ghs_arab_workshop_2006/Arab_Regional_GHS_Workshop_Report_final_rev.pdf
SDN	Sudan	0			No information found.
SEN	Senegal	0			During 2005-2007, Senegal participated as a pilot country in the UNITAR/ILO Global GHS Capacity Building Programme. NO further information found.
SGP	Singapore	1	Workplace Safety and Health Act (CHAPTER 354A)	GHS rev. 4 (2011)	Implemented for workplace.	http://www.mom.gov.sg/legislation/occupational-safety-health/Pages/workplace-safety-health-act.aspx	http://www.chemsafetypro.com/Topics/GHS/GHS_in_Singapore.html
SLB	Solomon Islands	0			No information found.
SLE	Sierra Leone	0			No information found.
SLV	El Salvador	0			No information found.
SMR	San Marino	0			No information found on GHS implementation. In a customs union with the EU.	http://www.ilo.org/dyn/natlex/natlex4.countrySubjects?p_lang=en&p_country=SMR
SOM	Somalia	0			No information found.
SRB	Serbia	2	Official Gazzete RS No. 105/2013, Regulation on Classification, Packaging, Labelling and Advertising, and Certain Chemical Products.	GHS rev. 2 (2007)	Fully implemented for substances and mixtures
SSD	South Sudan	0			No information found.
STP	Sao Tome and Principe	0			No information found.
SUR	Suriname	0			No information found.
SVK	Slovakia	2	Regulation (EC) No 1272/2008 of the European Parliament and of the Council of 16 December 2008 on classification, labelling and packaging of substances and mixtures, amending and repealing Directives 67/548/EEC and 1999/45/EC, and amending Regulation (EC) No 1907/2006 (Text with EEA relevance), http://eur-lex.europa.eu/legal-content/EN/TXT/?uri=CELEX:32008R1272	Continuously revised as new GHS revisions are published, currently at the 5th rev	Mandatory EU legislation	http://eur-lex.europa.eu/legal-content/EN/TXT/?uri=CELEX:32008R1272
SVN	Slovenia	2	Regulation (EC) No 1272/2008 of the European Parliament and of the Council of 16 December 2008 on classification, labelling and packaging of substances and mixtures, amending and repealing Directives 67/548/EEC and 1999/45/EC, and amending Regulation (EC) No 1907/2006 (Text with EEA relevance), http://eur-lex.europa.eu/legal-content/EN/TXT/?uri=CELEX:32008R1272	Continuously revised as new GHS revisions are published, currently at the 5th rev	Mandatory EU legislation	http://eur-lex.europa.eu/legal-content/EN/TXT/?uri=CELEX:32008R1272
SWE	Sweden	2	Regulation (EC) No 1272/2008 of the European Parliament and of the Council of 16 December 2008 on classification, labelling and packaging of substances and mixtures, amending and repealing Directives 67/548/EEC and 1999/45/EC, and amending Regulation (EC) No 1907/2006 (Text with EEA relevance), http://eur-lex.europa.eu/legal-content/EN/TXT/?uri=CELEX:32008R1272	Continuously revised as new GHS revisions are published, currently at the 5th rev	Mandatory EU legislation	http://eur-lex.europa.eu/legal-content/EN/TXT/?uri=CELEX:32008R1272
SWZ	Swaziland	0			SADC member, agreed to implement GHS by 2020, no further information found.
SYC	Seychelles	0			SADC member, agreed to implement GHS by 2020, no further information found.
SYR	Syrian Arab Republic	0			No information found.
TCD	Chad	0			No information found.
TGO	Togo	0			Workshop on GHS was held in 2013. No further information found.	http://www.unitar.org/national-forum-governance-and-priority-setting-chemicals-management-togo
THA	Thailand	1	B.E.2555 “Hazard Classifications and Communication System of Hazardous Substances”, issued by the Ministry of Industry of Thailand and published in the Government Gazette 12 March 2012.	GHS rev. 3 (2009)	Implementation for the workplace for the substances under the Hazardous Substances Act, with remaining deadlines for mixtures until 2020. Work ongoing for implementation in other sectors under the FDA and DOA.	http://eis.diw.go.th/haz/Laws/15.pdf
TJK	Tajikistan	0		GHS rev. 4 (2011)	The CIS countries have agreed on a number of voluntary standards (GOST 30333-2007, GOST 31340-2013 and GOST 32419-2013) corresponding to the 4th revision of GHS and the classification system uses all categories and classes. Not all countries have started to implement the standards. Tajikistan has an ongoing SAICM QSP project on GHS (UNITAR)	www.gostinfo.ru
TKM	Turkmenistan	0		GHS rev. 4 (2011)	The CIS countries have agreed on a number of voluntary standards (GOST 30333-2007, GOST 31340-2013 and GOST 32419-2013) corresponding to the 4th revision of GHS and the classification system uses all categories and classes. Not all countries have started to implement the standards.	www.gostinfo.ru
TLS	Timor-Leste	0			No information found.
TON	Tonga	0			No information found.
TTO	Trinidad and Tobago	0			No information found.		http://www.mwh.gov.jm/emd/publications/GHS%20Caribbean%20Assessment%20Report%20August%202013.pdf
TUN	Tunisia	0			No information found.
TUR	Turkey	2	Classification, Labelling and Packaging of Substances and Mixtures Regulation (SEA)	GHS rev. 3 (2009)	Full implementation since 31 May 2017. Since June 2017 new legislation passed, the KKDIK law which harmonizes the Turkish legislation with the EU legislation (REACH).	http://www.resmigazete.gov.tr/eskiler/2013/12/20131211M1-1.htm	http://www.resmigazete.gov.tr/eskiler/2017/06/20170623M1-18.htm
TUV	Tuvalu	0			No information found.
TZA	United Republic of Tanzania	0			Participated in regional workshop in October 2016, where a road map for a regional GHS implementation was drafted to be reviewed under 2017.	https://www.daily-mail.co.zm/need-to-harmonise-chemical-labelling/
UGA	Uganda	0			No information found.
UKR	Ukraine	0		GHS rev. 4 (2011)	The CIS countries have agreed on a number of voluntary standards (GOST 30333-2007, GOST 31340-2013 and GOST 32419-2013) corresponding to the 4th revision of GHS and the classification system uses all categories and classes. Not all countries have started to implement the standards.	www.gostinfo.ru
URY	Uruguay	1	Decree 307/09 and 346/11 of Labor Ministry		The decree 307 establishes the responsabilities of the distributors under the occupational environment legislation. GHS implementation in other sectors not legislated.	http://archivo.presidencia.gub.uy/_web/decretos/2009/07/T1397%20.pdf
USA	United States of America	1	Hazard communication standard (HCS)	GHS rev. 3 (2009)	GHS implemented in the workplace.	https://www.epa.gov/laws-regulations	https://s3.amazonaws.com/public-inspection.federalregister.gov/2012-04826.pdf
UZB	Uzbekistan	0		GHS rev. 4 (2011)	The CIS countries have agreed on a number of voluntary standards (GOST 30333-2007, GOST 31340-2013 and GOST 32419-2013) corresponding to the 4th revision of GHS and the classification system uses all categories and classes. Not all countries have started to implement the standards.	www.gostinfo.ru
VCT	Saint Vincent and the Grenadines	0			No information found.
VEN	Venezuela	0			No information found.
VNM	Viet Nam	2	Chemical Law, Decree 108/2008/ND-CP and Circular no. 04/2012/TT-BCT	GHS rev. 3 (2009)	Full implementation decided 30 June 2016, with upcoming deadlines in 2018 (desinfectants and insecticides for households) and 2020 (pesticides).	https://www.customs.gov.vn/default.aspx	http://www.cirs-reach.com/GHS/Vietnam_GHS_SDS_Labelling.html
VUT	Vanuatu	0			No information found.
WSM	Samoa	0			No information found.
YEM	Yemen	0			No information found.
ZAF	South Africa	0	SANS 10234:2008 (voluntary standard)	GHS rev. 2 (2007)	GHS has been implemented as a voluntary standard since 2008, and is now planned to be legislated during 2017, but no texts have yet been released.	https://law.resource.org/pub/za/ibr/za.sans.10234.2008.pdf	http://sawic.environment.gov.za/documents/4714.pdf
ZMB	Zambia	2	Statutory instrument no 112 of 2013, 22nd of November 2013, Government of Zambia		Implements GHS in all sectors	http://www.zema.org.zm/index.php/eia-reports?start=20
ZWE	Zimbabwe	0			SADC member, agreed to implement GHS by 2020, no further information found.
