# Supplementary material
Source: MDPI journal article supplement (https://www.mdpi.com/2071-1050/9/12/2176)
Supplement: s2 [file s2]

| <b>Name</b>            | <b>Organisation</b>                                                                                                                          | <b>Position</b>                                                       | <b>Date and location of interview</b> |
|------------------------|----------------------------------------------------------------------------------------------------------------------------------------------|-----------------------------------------------------------------------|---------------------------------------|
| Ms. Adriana Jalba      | Cefic (former)                                                                                                                               | Manager International Chemicals Management                            | 20161107, by telephone.               |
| Mr. Oliver Wootton     | UNITAR                                                                                                                                       | Training Associate, Chemicals & Waste Management Programme            | 20161116, by skype                    |
| Ms. Liz Anderson       | RPMASA, Responsible Packaging Management Association of Southern Africa, South Africa                                                        | Executive director                                                    | 20161130, by skype                    |
| Mr. Maxwell Nkoya      | Zambia Environmental Management Agency (ZEMA), Zambia                                                                                        | Director-operations                                                   | 2017-09-29, by phone and email        |
| Mr. Anthony Headley    | Environmental Protection Department, Barbados                                                                                                | Director                                                              | 20170116 by email                     |
| Mr. Lennart Dock       | International Unit Kemikalieinspektionen/Swedish Chemicals Agency (KemI)                                                                     | Programme Manager, Senior Adviser                                     | 20150519 and 20161212, at KemI        |
| Ms. Jelena Kovacevic   | Ministry of Sustainable Development and Tourism, Montenegro                                                                                  | Head of Department for industrial pollution and control and chemicals | 20170529, by email                    |
| Ms. Natalia Druzhinina | Partnership Coordinating Informational Center of CIS Member States on approximation of regulatory Practices (partnership CIS centre), Russia | Leading expert of Chemicals safety, Department                        | 20170116, by email                    |
| Ms. Yuwaree Inna       | Independent consultant, Thailand                                                                                                             | Chemicals management expert                                           | 20170529, by email                    |
